# Supplementary material
Source: publisher figshare collection journal article supplement (https://sage.figshare.com/ndownloader/files/22773695)
Supplement: Supplementary file 1 [file 22773695]

**Thoracic Endovascular Aortic Repair With Left Subclavian Artery Coverage Is Associated With a High 30-Day Stroke Incidence With or Without Concomitant Revascularization** Rens R.B. Varkevisser et al. *J Endovasc Ther.* 2020;27(5).

**Supplementary Table 1.** Primary or Concurrent CPT Codes Used to Identify TEVAR and LSA Revascularization Procedures.

| CPT Code | TEVAR + LSA Coverage Cases | Description                                                                                                                                                                         |
|----------|----------------------------|-------------------------------------------------------------------------------------------------------------------------------------------------------------------------------------|
| 33889    | 102                        | Open subclavian to carotid artery transposition performed in conjunction with endovascular repair of descending thoracic aorta, by neck incision, unilateral                        |
| 33891    | 19                         | Bypass graft, with other than vein, transcervical retropharyngeal carotid-carotid, performed in conjunction with endovascular repair of descending thoracic aorta, by neck incision |
| 35506    | 8                          | Bypass graft, with vein; common carotid-ipsilateral internal carotid carotid-subclavian or subclavian-carotid                                                                       |
| 35509    | 1                          | Bypass graft, with vein; carotid-contralateral carotid                                                                                                                              |
| 35510    | 0                          | Bypass graft, with vein; carotid-brachial                                                                                                                                           |
| 35511    | 0                          | Bypass graft, with vein; subclavian-subclavian                                                                                                                                      |
| 35512    | 0                          | Bypass graft, with vein; subclavian-brachial                                                                                                                                        |
| 35515    | 0                          | Bypass graft, with vein; subclavian-vertebral                                                                                                                                       |
| 35516    | 0                          | Bypass graft, with vein; subclavian-axillary                                                                                                                                        |
| 35518    | 0                          | Bypass graft, with vein; axillary-axillary                                                                                                                                          |
| 35606    | 104                        | Bypass graft, with other than vein; carotid-subclavian                                                                                                                              |
| 35612    | 0                          | Bypass graft, with other than vein; subclavian-subclavian                                                                                                                           |
| 35616    | 0                          | Bypass graft, with other than vein; subclavian-axillary                                                                                                                             |
| 35642    | 0                          | Bypass graft, with other than vein; carotid-vertebral                                                                                                                               |
| 35650    | 0                          | Bypass graft, with other than vein; axillary-axillary                                                                                                                               |
| 35691    | 6                          | Transposition and/or reimplantation; vertebral to carotid artery                                                                                                                    |
| 35693    | 0                          | Transposition and/or reimplantation; vertebral to subclavian artery                                                                                                                 |
| 35694    | 6                          | Transposition and/or reimplantation; subclavian to carotid artery                                                                                                                   |
| 35695    | 1                          | Transposition and/or reimplantation; carotid to subclavian artery                                                                                                                   |

Abbreviations: CPT, current procedural terminology; LSA, left subclavian artery; TEVAR, thoracic endovascular aortic repair.

**Thoracic Endovascular Aortic Repair With Left Subclavian Artery Coverage Is Associated With a High 30-Day Stroke Incidence With or Without Concomitant Revascularization** Rens R.B. Varkevisser et al. *J Endovasc Ther.* 2020;27(5).

**Supplementary Table 2.** Included Primary Postoperative Diagnosis Codes for Isolated LSA Revascularizations.

| ICD-9  | ICD-10  | Description                                                                          |
|--------|---------|--------------------------------------------------------------------------------------|
| 435.2  | G45.8   | Subclavian steal syndrome                                                            |
| 435.3  | G45.0   | Vertebrobasilar artery syndrome                                                      |
| 440.0  | I70.0   | Atherosclerosis of aorta                                                             |
| 440.20 | I70.209 | Atherosclerosis of native arteries of the extremities unspecified                    |
| 440.21 | I70.219 | Atherosclerosis of native arteries of the extremities with intermittent claudication |
| 440.22 | I70.229 | Atherosclerosis of native arteries of the extremities with rest pain                 |
| 440.23 | I70.025 | Atherosclerosis of native arteries of the extremities with ulceration                |
| 440.29 | I70.299 | Atherosclerosis, of native extremity arteries, not elsewhere classifiable            |
| 440.8  | I70.8   | Atherosclerosis of other specified arteries                                          |
| 447.1  | I77.1   | Stricture of artery                                                                  |

Abbreviations: ICD, International Classification of Diseases, 9th or 10<sup>th</sup> revision; LSA, left subclavian artery.

**Thoracic Endovascular Aortic Repair With Left Subclavian Artery Coverage Is Associated With a High 30-Day Stroke Incidence With or Without Concomitant Revascularization** Rens R.B. Varkevisser et al. *J Endovasc Ther.* 2020;27(5).

**Supplementary Table 3.** Cases Excluded Based on Primary CPT Codes.

| CPT Code | Description                                                                                                                                                                                                                                                        |
|----------|--------------------------------------------------------------------------------------------------------------------------------------------------------------------------------------------------------------------------------------------------------------------|
| 33506    | Repair of anomalous coronary artery from pulmonary artery origin; by translocation from pulmonary artery to aorta                                                                                                                                                  |
| 33510    | Coronary artery bypass, vein only; single coronary venous graft                                                                                                                                                                                                    |
| 33800    | Aortic suspension (aortopexy) for tracheal decompression (eg, for tracheomalacia) (separate procedure)                                                                                                                                                             |
| 33860    | Ascending aorta graft, with cardiopulmonary bypass, includes valve suspension, when performed                                                                                                                                                                      |
| 33875    | Descending thoracic aorta graft, with or without bypass                                                                                                                                                                                                            |
| 33877    | Repair of thoracoabdominal aortic aneurysm with graft, with or without cardiopulmonary bypass                                                                                                                                                                      |
| 34800    | Endovascular repair of infrarenal abdominal aortic aneurysm or dissection; using aorto-aortic tube prosthesis                                                                                                                                                      |
| 34802    | Endovascular repair of infrarenal abdominal aortic aneurysm or dissection; using modular bifurcated prosthesis (1 docking limb)                                                                                                                                    |
| 34803    | Endovascular repair of infrarenal abdominal aortic aneurysm or dissection; using modular bifurcated prosthesis (2 docking limbs)                                                                                                                                   |
| 34804    | Endovascular repair of infrarenal abdominal aortic aneurysm or dissection; using unibody bifurcated prosthesis                                                                                                                                                     |
| 34900    | Endovascular repair of iliac artery (eg, aneurysm, pseudoaneurysm, arteriovenous malformation, trauma) using ilio-iliac tube endoprosthesis                                                                                                                        |
| 35081    | Direct repair of aneurysm, pseudoaneurysm, or excision (partial or total) and graft insertion, with or without patch graft; for aneurysm, pseudoaneurysm, and associated occlusive disease, abdominal aorta                                                        |
| 35091    | Direct repair of aneurysm, pseudoaneurysm, or excision (partial or total) and graft insertion, with or without patch graft; for aneurysm, pseudoaneurysm, and associated occlusive disease, abdominal aorta involving visceral vessels (mesenteric, celiac, renal) |
| 35141    | Direct repair of aneurysm, pseudoaneurysm, or excision (partial or total) and graft insertion, with or without patch graft; for aneurysm, pseudoaneurysm, and associated occlusive disease, common femoral artery (profunda femoris, superficial femoral)          |
| 35571    | Bypass graft, with vein; popliteal-tibial, -peroneal artery or other distal vessels                                                                                                                                                                                |
| 35626    | Bypass graft, with other than vein; aortosubclavian, aortoinnominate, or aortocarotid                                                                                                                                                                              |
| 35631    | Bypass graft, with other than vein; aortoceliac, aortomesenteric,                                                                                                                                                                                                  |

|       |                                                                                                                                                                                                  |
|-------|--------------------------------------------------------------------------------------------------------------------------------------------------------------------------------------------------|
|       | aortorenal                                                                                                                                                                                       |
| 35636 | Bypass graft, with other than vein; splenorenal (splenic to renal arterial anastomosis)                                                                                                          |
| 35647 | Bypass graft, with other than vein; aortofemoral                                                                                                                                                 |
| 35656 | Bypass graft, with other than vein; femoral-popliteal                                                                                                                                            |
| 35665 | Bypass graft, with other than vein; iliofemoral                                                                                                                                                  |
| 37205 | Revascularization, endovascular, open or percutaneous, iliac artery, unilateral, initial vessel; with transluminal angioplasty                                                                   |
| 37220 | Revascularization, endovascular, open or percutaneous, iliac artery, unilateral, initial vessel; with transluminal angioplasty                                                                   |
| 37221 | Revascularization, endovascular, open or percutaneous, iliac artery, unilateral, initial vessel; with transluminal stent placement(s), includes angioplasty within the same vessel, when perform |
| 37616 | Ligation, major artery (eg, post-traumatic, rupture); chest                                                                                                                                      |
| 37799 | Unlisted procedure, vascular surgery                                                                                                                                                             |

Abbreviations: CPT, current procedural terminology.
